# Supplementary material
Source: PubMed Central journal article supplement (PMC4790660)
Supplement: lapf007039.ww1_default.pdf [file lapf007039.ww1_default.pdf]

**Table A1.** Rate ratio of acute kidney injury associated with exposure to current double or triple therapy combination (matching on general practice).

| Current Use*                                    | Cases<br>n=1642 | Controls<br>n=11 039 | RR (95% CI)         |                     |
|-------------------------------------------------|-----------------|----------------------|---------------------|---------------------|
|                                                 |                 |                      | crude               | adjusted†           |
| <i>diuretics only</i>                           | 147 (8.95)      | 1459 (13.22)         | Reference           | Reference           |
| <i>diuretics plus NSAIDs</i>                    | 130 (7.92)      | 965 (8.74)           | 1.35 (1.04 to 1.77) | 1.22 (0.92 to 1.63) |
| <i>ACEIs or ARBs only</i>                       | 109 (6.64)      | 935 (8.47)           | Reference           | Reference           |
| <i>ACEIs or ARBs plus NSAIDs</i>                | 96 (5.85)       | 847 (7.67)           | 1.06 (0.77 to 1.45) | 0.88 (0.63 to 1.24) |
| <i>diuretics plus ACEIs or ARBs</i>             | 329 (20.04)     | 1439 (13.04)         | Reference           | Reference           |
| <i>diuretics plus ACEIs or ARBs plus NSAIDs</i> | 430 (26.19)     | 1515 (13.72)         | 1.14 (0.95 to 1.35) | 1.05 (0.86 to 1.27) |

Values are reported as n (%); RR=rate ratio; CI=confidence interval

\*Within 90 days before the index date; current users of other antihypertensive drugs and past users (more than 90 days before the index date) of double and triple therapy combinations are not displayed in the table, but were considered in the regression model

†Adjusted for the covariates listed in Table 1

**Table A2.** Rate ratio of acute kidney injury associated with exposure to current double or triple therapy combination according to NSAIDs half-life and duration of use (matching on general practice).

| Current Use*                                    | Cases<br>n=1642 | Controls<br>n=11 039 | RR (95% CI)         |                       |
|-------------------------------------------------|-----------------|----------------------|---------------------|-----------------------|
|                                                 |                 |                      | crude               | adjusted <sup>†</sup> |
| <i>diuretics only</i>                           | 147 (8.95)      | 1459 (13.22)         | Reference           | Reference             |
| <i>diuretics plus NSAIDs</i>                    |                 |                      |                     |                       |
| NSAIDs half-life <12 hours                      | 125 (7.61)      | 910 (8.24)           | 1.38 (1.05 to 1.80) | 1.24 (0.93 to 1.66)   |
| ≥12 hours                                       | 5 (0.30)        | 55 (0.50)            | 0.97 (0.36 to 2.56) | 0.87 (0.31 to 2.48)   |
| duration of use <sup>‡</sup> ≤ 30 days          | 28 (1.71)       | 105 (0.95)           | 2.60 (1.59 to 4.24) | 2.10 (1.23 to 3.60)   |
| 31-60 days                                      | 21 (1.28)       | 139 (1.26)           | 1.30 (0.76 to 2.21) | 1.34 (0.76 to 2.36)   |
| 61-90 days                                      | 26 (1.58)       | 168 (1.52)           | 1.70 (1.04 to 2.76) | 1.55 (0.92 to 2.62)   |
| >90 days                                        | 55 (3.35)       | 553 (5.01)           | 1.02 (0.72 to 1.44) | 0.89 (0.61 to 1.30)   |
| <i>ACEIs or ARBs only</i>                       |                 |                      |                     |                       |
| <i>ACEIs or ARBs plus NSAIDs</i>                | 109 (6.64)      | 935 (8.47)           | Reference           | Reference             |
| NSAIDs half-life <12 hours                      | 92 (5.60)       | 817 (7.40)           | 1.05 (0.77 to 1.45) | 0.88 (0.62 to 1.24)   |
| ≥12 hours                                       | 4 (0.24)        | 30 (0.27)            | 1.11 (0.36 to 3.40) | 0.81 (0.24 to 2.81)   |
| duration of use <sup>‡</sup> ≤ 30 days          | 9 (0.55)        | 87 (0.79)            | 0.90 (0.42 to 1.96) | 0.87 (0.38 to 1.98)   |
| 31-60 days                                      | 18 (1.10)       | 106 (0.96)           | 1.71 (0.96 to 3.03) | 1.52 (0.81 to 2.84)   |
| 61-90 days                                      | 21 (1.28)       | 156 (1.41)           | 1.20 (0.70 to 2.05) | 0.94 (0.53 to 1.68)   |
| >90 days                                        | 48 (2.92)       | 498 (4.51)           | 0.90 (0.61 to 1.31) | 0.72 (0.48 to 1.09)   |
| <i>diuretics plus ACEIs or ARBs</i>             |                 |                      |                     |                       |
| <i>diuretics plus ACEIs or ARBs plus NSAIDs</i> | 329 (20.04)     | 1439 (13.04)         | Reference           | Reference             |
| NSAIDs half-life <12 hours                      | 409 (24.91)     | 1472 (13.33)         | 1.11 (0.93 to 1.33) | 1.02 (0.84 to 1.24)   |
| ≥12 hours                                       | 21 (1.28)       | 43 (0.39)            | 2.00 (1.10 to 3.64) | 2.23 (1.17 to 4.28)   |
| duration of use <sup>‡</sup> ≤ 30 days          | 69 (4.20)       | 122 (1.11)           | 2.10 (1.48 to 2.98) | 1.58 (1.07 to 2.32)   |
| 31-60 days                                      | 73 (4.45)       | 178 (1.61)           | 1.72 (1.24 to 2.39) | 1.52 (1.07 to 2.18)   |
| 61-90 days                                      | 104 (6.33)      | 324 (2.94)           | 1.23 (0.93 to 1.62) | 1.11 (0.82 to 1.50)   |

|  |          |             |            |                     |                     |
|--|----------|-------------|------------|---------------------|---------------------|
|  | >90 days | 184 (11.21) | 891 (8.07) | 0.84 (0.68 to 1.05) | 0.82 (0.64 to 1.04) |
|--|----------|-------------|------------|---------------------|---------------------|

Values are reported as n (%); RR=rate ratio; CI=confidence interval

\*Within 90 days before the index date; current users of other antihypertensive drugs and past users (more than 90 days before the index date) of double and triple therapy combinations are not displayed in the table, but were considered in the regression model

#Length of exposure to double or triple therapy combination

†Adjusted for the covariates listed in Table 1

**Table B1.** Rate ratio of acute kidney injury associated with exposure to current double or triple therapy combination stratifying by calendar period (index date).

| Current Use*                                    | Cases<br>n=2215 | Controls<br>n=21 993 | RR (95% CI)         |                     |
|-------------------------------------------------|-----------------|----------------------|---------------------|---------------------|
|                                                 |                 |                      | crude               | adjusted†           |
| <b>1998-2002:</b>                               |                 |                      |                     |                     |
| <i>diuretics only</i>                           | 48 (15.0)       | 694 (21.2)           | Reference           | Reference           |
| <i>diuretics plus NSAIDs</i>                    | 40 (12.5)       | 399 (12.2)           | 1.51 (0.97 to 2.35) | 1.22 (0.76 to 1.96) |
| <i>ACEIs or ARBs only</i>                       | 19 (5.9)        | 226 (6.9)            | Reference           | Reference           |
| <i>ACEIs or ARBs plus NSAIDs</i>                | 11 (3.4)        | 161 (4.9)            | 0.92 (0.42 to 2.01) | 0.72 (0.30 to 1.70) |
| <i>diuretics plus ACEIs or ARBs</i>             | 67 (20.9)       | 365 (11.2)           | Reference           | Reference           |
| <i>diuretics plus ACEIs or ARBs plus NSAIDs</i> | 85 (26.5)       | 300 (9.2)            | 1.56 (1.09 to 2.24) | 1.47 (0.98 to 2.20) |
| <b>2003-2007:</b>                               |                 |                      |                     |                     |
| <i>diuretics only</i>                           | 101 (10.4)      | 1380 (14.3)          | Reference           | Reference           |
| <i>diuretics plus NSAIDs</i>                    | 79 (8.1)        | 940 (9.7)            | 1.16 (0.85 to 1.59) | 1.03 (0.74 to 1.44) |
| <i>ACEIs or ARBs only</i>                       | 66 (6.8)        | 938 (9.7)            | Reference           | Reference           |
| <i>ACEIs or ARBs plus NSAIDs</i>                | 73 (7.5)        | 1001 (10.4)          | 1.06 (0.74 to 1.50) | 1.00 (0.69 to 1.46) |
| <i>diuretics plus ACEIs or ARBs</i>             | 229 (23.6)      | 1306 (13.5)          | Reference           | Reference           |
| <i>diuretics plus ACEIs or ARBs plus NSAIDs</i> | 300 (30.9)      | 1394 (14.4)          | 1.25 (1.03 to 1.51) | 1.24 (1.00 to 1.54) |
| <b>2008-2010:</b>                               |                 |                      |                     |                     |
| <i>diuretics only</i>                           | 60 (6.5)        | 558 (6.2)            | Reference           | Reference           |
| <i>diuretics plus NSAIDs</i>                    | 37 (4.0)        | 400 (4.4)            | 0.82 (0.53 to 1.28) | 0.73 (0.45 to 1.16) |
| <i>ACEIs or ARBs only</i>                       | 63 (6.8)        | 725 (8.0)            | Reference           | Reference           |
| <i>ACEIs or ARBs plus NSAIDs</i>                | 54 (5.9)        | 745 (8.2)            | 0.87 (0.59 to 1.27) | 0.85 (0.57 to 1.27) |

|                                                 |            |           |                     |                     |
|-------------------------------------------------|------------|-----------|---------------------|---------------------|
| <i>diuretics plus ACEIs or ARBs</i>             | 118 (12.8) | 761 (8.4) | Reference           | Reference           |
| <i>diuretics plus ACEIs or ARBs plus NSAIDs</i> | 159 (17.2) | 730 (8.1) | 1.47 (1.13 to 1.92) | 1.46 (1.10 to 1.94) |

Values are reported as n (%); RR=rate ratio; CI=confidence interval

\*Within 90 days before the index date; current users of other antihypertensive drugs and past users (more than 90 days before the index date) of double and triple therapy combinations are not displayed in the table, but were considered in the regression model

†Adjusted for the covariates listed in Table 1

**Table B2.** Rate ratio of acute kidney injury associated with exposure to current double or triple therapy combination stratifying by diabetes diagnosis.

| Current Use*                                    | Cases<br>n=2215 | Controls<br>n=21 993 | RR (95% CI)         |                     |
|-------------------------------------------------|-----------------|----------------------|---------------------|---------------------|
|                                                 |                 |                      | crude               | adjusted†           |
| <b>Without diabetes:</b>                        |                 |                      |                     |                     |
| <i>diuretics only</i>                           | 178 (12.0)      | 2400 (13.3)          | Reference           | Reference           |
| <i>diuretics plus NSAIDs</i>                    | 124 (8.3)       | 1541 (8.5)           | 1.08 (0.85 to 1.38) | 0.99 (0.77 to 1.28) |
| <i>ACEIs or ARBs only</i>                       | 95 (6.4)        | 1433 (7.9)           | Reference           | Reference           |
| <i>ACEIs or ARBs plus NSAIDs</i>                | 73 (4.9)        | 1352 (7.5)           | 0.83 (0.60 to 1.15) | 0.80 (0.57 to 1.12) |
| <i>diuretics plus ACEIs or ARBs</i>             | 263 (17.7)      | 1957 (10.8)          | Reference           | Reference           |
| <i>diuretics plus ACEIs or ARBs plus NSAIDs</i> | 320 (21.5)      | 1735 (9.6)           | 1.37 (1.14 to 1.64) | 1.37 (1.13 to 1.67) |
| <b>With diabetes:</b>                           |                 |                      |                     |                     |
| <i>diuretics only</i>                           | 31 (4.3)        | 232 (5.9)            | Reference           | Reference           |
| <i>diuretics plus NSAIDs</i>                    | 32 (4.4)        | 198 (5.1)            | 1.36 (0.67 to 2.77) | 1.61 (0.71 to 3.65) |
| <i>ACEIs or ARBs only</i>                       | 53 (7.3)        | 456 (11.7)           | Reference           | Reference           |
| <i>ACEIs or ARBs plus NSAIDs</i>                | 65 (9.0)        | 555 (14.2)           | 0.75 (0.46 to 1.22) | 0.84 (0.48 to 1.47) |
| <i>diuretics plus ACEIs or ARBs</i>             | 151 (20.8)      | 475 (12.2)           | Reference           | Reference           |
| <i>diuretics plus ACEIs or ARBs plus NSAIDs</i> | 224 (30.9)      | 689 (17.6)           | 1.17 (0.84 to 1.62) | 1.52 (1.04 to 2.22) |

Values are reported as n (%); RR=rate ratio; CI=confidence interval

\*Within 90 days before the index date; current users of other antihypertensive drugs and past users (more than 90 days before the index date) of double and triple therapy combinations are not displayed in the table, but were considered in the regression model

†Adjusted for the covariates listed in Table 1

**Table C1.** Rate ratio of acute kidney injury associated with exposure to current double or triple therapy combination (60-day period for both current time-window and grace period).

| Current Use*                                    | Cases<br>n=2215 | Controls<br>n=21 993 | RR (95% CI)         |                     |
|-------------------------------------------------|-----------------|----------------------|---------------------|---------------------|
|                                                 |                 |                      | crude               | adjusted†           |
| <i>diuretics only</i>                           | 210 (9.5)       | 2607 (11.9)          | Reference           | Reference           |
| <i>diuretics plus NSAIDs</i>                    | 144 (6.5)       | 1611 (7.3)           | 1.15 (0.92 to 1.44) | 1.00 (0.79 to 1.27) |
| <i>ACEIs or ARBs only</i>                       | 133 (6.0)       | 1853 (8.4)           | Reference           | Reference           |
| <i>ACEIs or ARBs plus NSAIDs</i>                | 131 (5.9)       | 1787 (8.1)           | 1.05 (0.82 to 1.35) | 0.97 (0.74 to 1.26) |
| <i>diuretics plus ACEIs or ARBs</i>             | 415 (18.7)      | 2318 (10.5)          | Reference           | Reference           |
| <i>diuretics plus ACEIs or ARBs plus NSAIDs</i> | 484 (21.9)      | 2236 (10.2)          | 1.24 (1.07 to 1.43) | 1.21 (1.03 to 1.41) |

Values are reported as n (%); RR=rate ratio; CI=confidence interval

\*Within 60 days before the index date; current users of other antihypertensive drugs and past users (more than 60 days before the index date) of double and triple therapy combinations are not displayed in the table, but were considered in the regression model

†Adjusted for the covariates listed in Table 1

**Table C2.** Rate ratio of acute kidney injury associated with exposure to current double or triple therapy combination according to NSAIDs half-life and duration of use (60-day period for both current time-window and grace period).

| Current Use*                                    | Cases<br>n=2215 | Controls<br>n=21 993 | RR (95% CI)         |                       |
|-------------------------------------------------|-----------------|----------------------|---------------------|-----------------------|
|                                                 |                 |                      | crude               | adjusted <sup>†</sup> |
| <i>diuretics only</i>                           | 210 (9.5)       | 2607 (11.9)          | Reference           | Reference             |
| <i>diuretics plus NSAIDs</i>                    |                 |                      |                     |                       |
| NSAIDs half-life <12 hours                      | 139 (6.3)       | 1539 (7.0)           | 1.16 (0.93 to 1.46) | 1.01 (0.80 to 1.28)   |
| ≥12 hours                                       | 5 (0.2)         | 72 (0.3)             | 0.85 (0.34 to 2.12) | 0.81 (0.32 to 2.07)   |
| duration of use <sup>‡</sup> ≤30 days           | 32 (1.4)        | 244 (1.1)            | 1.63 (1.10 to 2.42) | 1.24 (0.81 to 1.89)   |
| 31-60 days                                      | 41 (1.9)        | 375 (1.7)            | 1.36 (0.92 to 1.94) | 1.13 (0.78 to 1.64)   |
| 61-90 days                                      | 47 (2.1)        | 676 (3.1)            | 0.90 (0.65 to 1.25) | 0.81 (0.57 to 1.14)   |
| >90 days                                        | 24 (1.1)        | 316 (1.4)            | 1.00 (0.64 to 1.55) | 1.01 (0.64 to 1.60)   |
| <i>ACEIs or ARBs only</i>                       |                 |                      |                     |                       |
| <i>ACEIs or ARBs plus NSAIDs</i>                | 133 (6.0)       | 1853 (8.4)           | Reference           | Reference             |
| <i>ACEIs or ARBs plus NSAIDs</i>                |                 |                      |                     |                       |
| NSAIDs half-life <12 hours                      | 127 (5.7)       | 1743 (7.9)           | 1.05 (0.81 to 1.35) | 0.97 (0.75 to 1.27)   |
| ≥12 hours                                       | 4 (0.2)         | 44 (0.2)             | 1.23 (0.43 to 3.50) | 0.84 (0.27 to 2.63)   |
| duration of use <sup>‡</sup> ≤30 days           | 19 (0.9)        | 223 (1.0)            | 1.22 (0.74 to 2.02) | 1.25 (0.74 to 2.11)   |
| 31-60 days                                      | 39 (1.8)        | 444 (2.0)            | 1.22 (0.84 to 1.78) | 1.08 (0.73 to 1.60)   |
| 61-90 days                                      | 53 (2.4)        | 767 (3.5)            | 0.99 (0.71 to 1.38) | 0.89 (0.63 to 1.26)   |
| >90 days                                        | 20 (0.9)        | 353 (1.6)            | 0.83 (0.51 to 1.34) | 0.80 (0.48 to 1.33)   |
| <i>diuretics plus ACEIs or ARBs</i>             |                 |                      |                     |                       |
| <i>diuretics plus ACEIs or ARBs plus NSAIDs</i> | 415 (18.7)      | 2318 (10.5)          | Reference           | Reference             |
| <i>diuretics plus ACEIs or ARBs plus NSAIDs</i> |                 |                      |                     |                       |
| NSAIDs half-life <12 hours                      | 466 (21.0)      | 2175 (9.9)           | 1.22 (1.06 to 1.42) | 1.19 (1.02 to 1.40)   |
| ≥12 hours                                       | 18 (0.8)        | 61 (0.3)             | 1.65 (0.96 to 2.83) | 1.77 (0.99 to 3.17)   |
| duration of use <sup>‡</sup> ≤30 days           | 90 (4.1)        | 257 (1.2)            | 1.94 (1.49 to 2.53) | 1.77 (1.33 to 2.36)   |
| 31-60 days                                      | 136 (6.1)       | 549 (2.5)            | 1.41 (1.13 to 1.74) | 1.34 (1.06 to 1.69)   |
| 61-90 days                                      | 192 (8.7)       | 1013 (4.6)           | 1.09 (0.90 to 1.31) | 1.04 (0.85 to 1.27)   |
| >90 days                                        | 66 (3.0)        | 417 (1.9)            | 0.91 (0.69 to 1.21) | 1.02 (0.75 to 1.37)   |



Values are reported as n (%); RR=rate ratio; CI=confidence interval

\*Within 60 days before the index date; current users of other antihypertensive drugs and past users (more than 60 days before the index date) of double and triple therapy combinations are not displayed in the table, but were considered in the regression model

‡Length of exposure to double or triple combination

†Adjusted for the covariates listed in Table 1

**Table D1.** Rate ratio of acute kidney injury associated with exposure to current double or triple therapy combination (30-day period for both current time-window and grace period).

| Current Use*                                    | Cases<br>n=2215 | Controls<br>n=21 993 | RR (95% CI)         |                     |
|-------------------------------------------------|-----------------|----------------------|---------------------|---------------------|
|                                                 |                 |                      | crude               | adjusted†           |
| <i>diuretics only</i>                           | 196 (8.9)       | 2556 (11.6)          | Reference           | Reference           |
| <i>diuretics plus NSAIDs</i>                    | 145 (6.6)       | 1470 (6.7)           | 1.32 (1.05 to 1.66) | 1.15 (0.91 to 1.46) |
| <i>ACEIs or ARBs only</i>                       | 136 (6.1)       | 1882 (8.6)           | Reference           | Reference           |
| <i>ACEIs or ARBs plus NSAIDs</i>                | 124 (5.6)       | 1652 (7.5)           | 1.07 (0.83 to 1.38) | 1.00 (0.77 to 1.31) |
| <i>diuretics plus ACEIs or ARBs</i>             | 403 (18.2)      | 2217 (10.1)          | Reference           | Reference           |
| <i>diuretics plus ACEIs or ARBs plus NSAIDs</i> | 413 (18.7)      | 1943 (8.8)           | 1.19 (1.02 to 1.38) | 1.16 (0.98 to 1.36) |

Values are reported as n (%); RR=rate ratio; CI=confidence interval

\*Within 30 days before the index date; current users of other antihypertensive drugs and past users (more than 30 days before the index date) of double and triple combinations are not displayed in the table, but were considered in the regression model

†Adjusted for the covariates listed in Table 1

**Table D2.** Rate ratio of acute kidney injury associated with exposure to current double or triple therapy combination according to NSAIDs half-life and duration of use (30-day period for both current time-window and grace period).

| Current Use*                                    | Cases<br>n=2215 | Controls<br>n=21 993 | RR (95% CI)         |                       |
|-------------------------------------------------|-----------------|----------------------|---------------------|-----------------------|
|                                                 |                 |                      | crude               | adjusted <sup>†</sup> |
| <i>diuretics only</i>                           | 196 (8.9)       | 2556 (11.6)          | Reference           | Reference             |
| <i>diuretics plus NSAIDs</i>                    |                 |                      |                     |                       |
| NSAIDs half-life<12 hours                       | 139 (6.3)       | 1414 (6.4)           | 1.32 (1.05 to 1.66) | 1.14 (0.90 to 1.45)   |
| ≥12 hours                                       | 6 (0.3)         | 56 (0.3)             | 1.34 (0.57 to 3.17) | 1.41 (0.59 to 3.38)   |
| duration of use <sup>‡</sup> ≤30 days           | 53 (2.4)        | 369 (1.7)            | 1.90 (1.37 to 2.62) | 1.48 (1.05 to 2.08)   |
| 31-60 days                                      | 68 (3.1)        | 812 (3.7)            | 1.12 (0.84 to 1.49) | 0.99 (0.73 to 1.34)   |
| 61-90 days                                      | 21 (1.0)        | 246 (1.1)            | 1.15 (0.72 to 1.84) | 1.11 (0.68 to 1.82)   |
| >90 days                                        | 3 (0.1)         | 43 (0.2)             | 0.93 (0.29 to 3.04) | 1.14 (0.34 to 3.77)   |
| <i>ACEIs or ARBs only</i>                       |                 |                      |                     |                       |
| <i>ACEIs or ARBs plus NSAIDs</i>                | 136 (6.1)       | 1882 (8.6)           | Reference           | Reference             |
| NSAIDs half-life<12 hours                       | 121 (5.5)       | 1617 (7.4)           | 1.07 (0.83 to 1.38) | 1.02 (0.78 to 1.33)   |
| ≥12 hours                                       | 3 (0.1)         | 35 (0.2)             | 1.18 (0.36 to 3.89) | 0.64 (0.17 to 2.39)   |
| duration of use <sup>‡</sup> ≤30 days           | 35 (1.6)        | 401 (1.8)            | 1.25 (0.85 to 1.85) | 1.16 (0.77 to 1.76)   |
| 31-60 days                                      | 68 (3.1)        | 864 (3.9)            | 1.12 (0.83 to 1.52) | 1.01 (0.74 to 1.40)   |
| 61-90 days                                      | 18 (0.8)        | 342 (1.6)            | 0.76 (0.46 to 1.26) | 0.78 (0.46 to 1.32)   |
| >90 days                                        | 3 (0.1)         | 45 (0.2)             | 0.94 (0.29 to 3.08) | 0.93 (0.24 to 3.62)   |
| <i>diuretics plus ACEIs or ARBs</i>             |                 |                      |                     |                       |
| <i>diuretics plus ACEIs or ARBs plus NSAIDs</i> | 403 (18.2)      | 2217 (10.1)          | Reference           | Reference             |
| NSAIDs half-life<12 hours                       | 413 (18.7)      | 1943 (8.8)           | 1.19 (1.02 to 1.38) | 1.14 (0.97 to 1.35)   |
| ≥12 hours                                       | 14 (0.6)        | 51 (0.2)             | 1.51 (0.82 to 2.76) | 1.63 (0.86 to 3.10)   |
| duration of use <sup>‡</sup> ≤30 days           | 127 (5.7)       | 465 (2.1)            | 1.52 (1.21 to 1.90) | 1.41 (1.11 to 1.80)   |
| 31-60 days                                      | 232 (10.5)      | 1137 (5.2)           | 1.14 (0.96 to 1.36) | 1.08 (0.89 to 1.31)   |
| 61-90 days                                      | 56 (2.5)        | 346 (1.6)            | 0.92 (0.68 to 1.24) | 0.93 (0.67 to 1.29)   |

---

|          |          |          |                     |                     |
|----------|----------|----------|---------------------|---------------------|
| >90 days | 12 (0.5) | 46 (0.2) | 1.43 (0.75 to 2.74) | 1.89 (0.96 to 3.73) |
|----------|----------|----------|---------------------|---------------------|

---

Values are reported as n (%); RR=rate ratio; CI=confidence interval

\*Within 30 days before the index date; current users of other antihypertensive drugs and past users (more than 30 days before the index date) of double and triple therapy combinations are not displayed in the table, but were considered in the regression model

‡Length of exposure to double or triple combination

†Adjusted for the covariates listed in Table 1

**Table E1.** Rate ratio of acute kidney injury associated with exposure to current double or triple therapy combination among incident users of antihypertensive drugs.

| Current Use*                                    | Cases<br>n=618 | Controls<br>n=6105 | RR (95% CI)         |                       |
|-------------------------------------------------|----------------|--------------------|---------------------|-----------------------|
|                                                 |                |                    | crude               | adjusted <sup>†</sup> |
| <i>diuretics only</i>                           | 65 (10.5)      | 732 (12.0)         | Reference           | Reference             |
| <i>diuretics plus NSAIDs</i>                    | 43 (7.0)       | 409 (6.7)          | 1.22 (0.81 to 1.83) | 1.18 (0.76 to 1.81)   |
| <i>ACEIs or ARBs only</i>                       | 56 (9.1)       | 611 (10.0)         | Reference           | Reference             |
| <i>ACEIs or ARBs plus NSAIDs</i>                | 58 (9.4)       | 591 (9.7)          | 1.13 (0.77 to 1.67) | 1.09 (0.72 to 1.66)   |
| <i>diuretics plus ACEIs or ARBs</i>             | 82 (13.3)      | 496 (8.1)          | Reference           | Reference             |
| <i>diuretics plus ACEIs or ARBs plus NSAIDs</i> | 117 (18.9)     | 444 (7.3)          | 1.57 (1.15 to 2.15) | 1.46 (1.04 to 2.06)   |

Values are reported as n (%); RR=rate ratio; CI=confidence interval

\*Within 90 days before the index date; current users of other antihypertensive drugs and past users (more than 90 days before the index date) of double and triple therapy combinations are not displayed in the table, but were considered in the regression model

<sup>†</sup>Adjusted for the covariates listed in Table 1

**Table E2.** Rate ratio of acute kidney injury associated with exposure to current double or triple therapy combination according to NSAIDs half- life and duration of use, among incident users of antihypertensive drugs.

| Current Use*                                    | Cases<br>n=618 | Controls<br>n=6105 | RR (95% CI)         |                       |
|-------------------------------------------------|----------------|--------------------|---------------------|-----------------------|
|                                                 |                |                    | crude               | adjusted <sup>†</sup> |
| <i>diuretics only</i>                           | 65 (10.5)      | 732 (12.0)         | Reference           | Reference             |
| <i>diuretics plus NSAIDs</i>                    |                |                    |                     |                       |
| NSAIDs half-life<12 hours                       | 42 (6.8)       | 384 (6.3)          | 1.26 (0.84 to 1.91) | 1.22 (0.79 to 1.89)   |
| ≥12 hours                                       | 1 (0.2)        | 25 (0.4)           | 0.46 (0.06 to 3.47) | 0.46 (0.06 to 3.55)   |
| duration of use <sup>‡</sup> ≤30 days           | 11 (1.8)       | 65 (1.1)           | 1.89 (0.95 to 3.77) | 1.56 (0.75 to 3.24)   |
| 31-60 days                                      | 7 (1.1)        | 59 (1.0)           | 1.22 (0.52 to 2.86) | 1.23 (0.51 to 2.97)   |
| 61-90 days                                      | 10 (1.6)       | 96 (1.6)           | 1.26 (0.62 to 2.54) | 1.18 (0.57 to 2.46)   |
| >90 days                                        | 15 (2.4)       | 189 (3.1)          | 0.93 (0.52 to 1.68) | 0.97 (0.52 to 1.82)   |
| <i>ACEIs or ARBs only</i>                       |                |                    |                     |                       |
| 56 (9.1)                                        | 611 (10.0)     | Reference          | Reference           |                       |
| <i>ACEIs or ARBs plus NSAIDs</i>                |                |                    |                     |                       |
| NSAIDs half-life<12 hours                       | 56 (9.1)       | 569 (9.3)          | 1.14 (0.77 to 1.68) | 1.10 (0.72 to 1.68)   |
| ≥12 hours                                       | 2 (0.3)        | 22 (0.4)           | 0.97 (0.22 to 4.28) | 0.95 (0.21 to 4.37)   |
| duration of use <sup>‡</sup> ≤30 days           | 9 (1.5)        | 56 (0.9)           | 1.81 (0.84 to 3.92) | 1.86 (0.82 to 4.19)   |
| 31-60 days                                      | 8 (1.3)        | 79 (1.3)           | 1.13 (0.51 to 2.48) | 0.96 (0.41 to 2.23)   |
| 61-90 days                                      | 12 (1.9)       | 136 (2.2)          | 0.99 (0.51 to 1.90) | 1.01 (0.51 to 2.01)   |
| >90 days                                        | 29 (4.7)       | 320 (5.2)          | 1.07 (0.67 to 1.72) | 1.02 (0.61 to 1.71)   |
| <i>diuretics plus ACEIs or ARBs</i>             |                |                    |                     |                       |
| 82 (13.3)                                       | 496 (8.1)      | Reference          | Reference           |                       |
| <i>diuretics plus ACEIs or ARBs plus NSAIDs</i> |                |                    |                     |                       |
| NSAIDs half-life<12 hours                       | 111 (18.0)     | 429 (7.0)          | 1.55 (1.13 to 2.12) | 1.43 (1.01 to 2.03)   |
| ≥12 hours                                       | 6 (1.0)        | 15 (0.3)           | 2.66 (0.97 to 7.31) | 2.85 (0.96 to 8.49)   |
| duration of use <sup>‡</sup> ≤30 days           | 21 (3.4)       | 46 (0.8)           | 2.64 (1.47 to 4.73) | 2.06 (1.06 to 3.99)   |
| 31-60 days                                      | 21 (3.4)       | 74 (1.2)           | 1.66 (0.97 to 2.84) | 1.44 (0.80 to 2.59)   |
| 61-90 days                                      | 32 (5.2)       | 82 (1.3)           | 2.28 (1.42 to 3.66) | 2.00 (1.18 to 3.37)   |
| >90 days                                        | 43 (7.0)       | 242 (4.0)          | 1.11 (0.74 to 1.65) | 1.12 (0.72 to 1.76)   |

Values are reported as n (%); RR=rate ratio; CI=confidence interval

\*Within 90 days before the index date; current users of other antihypertensive drugs and past users (more than 90 days before the index date) of double and triple therapy combinations are not displayed in the table, but were considered in the regression model

‡Length of exposure to double or triple therapy combination

†Adjusted for the covariates listed in Table 1

**Table F1.** Rate ratio of acute kidney injury associated with exposure to current double or triple therapy combination among prevalent users of antihypertensive drugs.

| Current Use*                                    | Cases<br>n=1597 | Controls<br>n=15 888 | RR (95% CI)         |                     |
|-------------------------------------------------|-----------------|----------------------|---------------------|---------------------|
|                                                 |                 |                      | crude               | adjusted†           |
| <i>diuretics only</i>                           | 144 (9.0)       | 1900 (12.0)          | Reference           | Reference           |
| <i>diuretics plus NSAIDs</i>                    | 113 (7.1)       | 1330 (8.4)           | 1.14 (0.88 to 1.48) | 0.99 (0.76 to 1.30) |
| <i>ACEIs or ARBs only</i>                       | 92 (5.8)        | 1278 (8.0)           | Reference           | Reference           |
| <i>ACEIs or ARBs plus NSAIDs</i>                | 80 (5.0)        | 1316 (8.3)           | 0.87 (0.64 to 1.18) | 0.79 (0.57 to 1.09) |
| <i>diuretics plus ACEIs or ARBs</i>             | 332 (20.8)      | 1936 (12.2)          | Reference           | Reference           |
| <i>diuretics plus ACEIs or ARBs plus NSAIDs</i> | 427 (26.7)      | 1980 (12.5)          | 1.29 (1.10 to 1.50) | 1.27 (1.07 to 1.51) |

Values are reported as n (%); RR=rate ratio; CI=confidence interval

\*Within 90 days before the index date; current users of other antihypertensive drugs and past users (more than 90 days before the index date) of double and triple therapy combinations are not displayed in the table, but were considered in the regression model

†Adjusted for the covariates listed in Table 1



**Table F2.** Rate ratio of acute renal failure associated with exposure to current double or triple therapy combination according to NSAIDs half- life and duration of use, among prevalent users of antihypertensive drugs.

| Current Use*                                    | Cases<br>n=1597 | Controls<br>n=15 888 | RR (95% CI)         |                       |
|-------------------------------------------------|-----------------|----------------------|---------------------|-----------------------|
|                                                 |                 |                      | crude               | adjusted <sup>†</sup> |
| <i>diuretics only</i>                           | 144 (9.0)       | 1900 (12.0)          | Reference           | Reference             |
| <i>diuretics plus NSAIDs</i>                    |                 |                      |                     |                       |
| NSAIDs half-life <12 hours                      | 109 (6.8)       | 1272 (8.0)           | 1.15 (0.89 to 1.50) | 1.00 (0.76 to 1.31)   |
| ≥12 hours                                       | 4 (0.3)         | 58 (0.4)             | 0.87 (0.31 to 2.43) | 0.91 (0.32 to 2.58)   |
| duration of use <sup>‡</sup> ≤30 days           | 21 (1.3)        | 143 (0.9)            | 1.86 (1.14 to 3.04) | 1.44 (0.85 to 2.44)   |
| 31-60 days                                      | 19 (1.2)        | 187 (1.2)            | 1.36 (0.82 to 2.25) | 1.12 (0.65 to 1.90)   |
| 61-90 days                                      | 26 (1.6)        | 283 (1.8)            | 1.18 (0.76 to 1.83) | 1.02 (0.65 to 1.60)   |
| >90 days                                        | 47 (2.9)        | 717 (4.5)            | 0.89 (0.63 to 1.26) | 0.82 (0.57 to 1.16)   |
| <i>ACEIs or ARBs only</i>                       |                 |                      |                     |                       |
| 92 (5.8)                                        | 1278 (8.0)      | Reference            | Reference           |                       |
| <i>ACEIs or ARBs plus NSAIDs</i>                |                 |                      |                     |                       |
| NSAIDs half-life <12 hours                      | 76 (4.8)        | 1284 (8.1)           | 0.84 (0.62 to 1.16) | 0.77 (0.56 to 1.08)   |
| ≥12 hours                                       | 4 (0.3)         | 32 (0.2)             | 1.82 (0.63 to 5.28) | 1.17 (0.36 to 3.77)   |
| duration of use <sup>‡</sup> ≤30 days           | 8 (0.5)         | 139 (0.9)            | 0.80 (0.38 to 1.68) | 0.78 (0.36 to 1.69)   |
| 31-60 days                                      | 16 (1.0)        | 168 (1.1)            | 1.33 (0.76 to 2.33) | 1.16 (0.64 to 2.10)   |
| 61-90 days                                      | 18 (1.1)        | 254 (1.6)            | 1.03 (0.61 to 1.74) | 0.90 (0.52 to 1.57)   |
| >90 days                                        | 38 (2.4)        | 755 (4.8)            | 0.72 (0.49 to 1.06) | 0.64 (0.43 to 0.97)   |
| <i>diuretics plus ACEIs or ARBs</i>             |                 |                      |                     |                       |
| 82 (13.3)                                       | 496 (8.1)       | Reference            | Reference           |                       |
| <i>diuretics plus ACEIs or ARBs plus NSAIDs</i> |                 |                      |                     |                       |
| NSAIDs half-life <12 hours                      | 409 (25.6)      | 1914 (12.0)          | 1.28 (1.09 to 1.50) | 1.26 (1.06 to 1.49)   |
| ≥12 hours                                       | 18 (1.1)        | 66 (0.4)             | 1.54 (0.90 to 2.64) | 1.58 (0.90 to 2.80)   |
| duration of use <sup>‡</sup> ≤30 days           | 62 (3.9)        | 188 (1.2)            | 1.85 (1.35 to 2.53) | 1.74 (1.24 to 2.44)   |
| 31-60 days                                      | 73 (4.6)        | 235 (1.5)            | 1.81 (1.36 to 2.42) | 1.69 (1.24 to 2.31)   |
| 61-90 days                                      | 108 (6.8)       | 418 (2.6)            | 1.53 (1.20 to 1.95) | 1.46 (1.13 to 1.90)   |
| >90 days                                        | 184 (11.5)      | 1139 (7.2)           | 0.98 (0.80 to 1.19) | 0.99 (0.80 to 1.23)   |

Values are reported as n (%); RR=rate ratio; CI=confidence interval

\*Within 90 days before the index date; current users of other antihypertensive drugs and past users (more than 90 days before the index date) of double and triple therapy combinations are not displayed in the table, but were considered in the regression model

‡Length of exposure to double or triple therapy combination

†Adjusted for the covariates listed in Table 1

**Table G.** Rate ratio of acute kidney injury associated with exposure to current double or triple therapy combination stratifying by osteoarthritis diagnosis.

| Current Use*                                    | Cases<br>n=2215 | Controls<br>n=21 993 | RR (95% CI)         |                     |
|-------------------------------------------------|-----------------|----------------------|---------------------|---------------------|
|                                                 |                 |                      | crude               | adjusted†           |
| <b>Without osteoarthritis:</b>                  |                 |                      |                     |                     |
| <i>diuretics only</i>                           | 165 (9.4)       | 2175 (12.1)          | Reference           | Reference           |
| <i>diuretics plus NSAIDs</i>                    | 122 (6.9)       | 1361 (7.6)           | 1.21 (0.94 to 1.55) | 1.03 (0.79 to 1.35) |
| <i>ACEIs or ARBs only</i>                       | 117 (6.6)       | 1618 (9.0)           | Reference           | Reference           |
| <i>ACEIs or ARBs plus NSAIDs</i>                | 115 (6.5)       | 1564 (8.7)           | 1.03 (0.78 to 1.35) | 0.99 (0.74 to 1.33) |
| <i>diuretics plus ACEIs or ARBs</i>             | 327 (18.5)      | 1969 (11.0)          | Reference           | Reference           |
| <i>diuretics plus ACEIs or ARBs plus NSAIDs</i> | 418 (23.7)      | 1920 (10.7)          | 1.39 (1.18 to 1.64) | 1.38 (1.15 to 1.65) |
| <b>With osteoarthritis:</b>                     |                 |                      |                     |                     |
| <i>diuretics only</i>                           | 44 (9.8)        | 457 (11.2)           | Reference           | Reference           |
| <i>diuretics plus NSAIDs</i>                    | 34 (7.6)        | 378 (9.3)            | 0.76 (0.43 to 1.36) | 0.69 (0.36 to 1.33) |
| <i>ACEIs or ARBs only</i>                       | 31 (6.9)        | 271 (6.7)            | Reference           | Reference           |
| <i>ACEIs or ARBs plus NSAIDs</i>                | 23 (5.1)        | 343 (8.4)            | 0.64 (0.32 to 1.26) | 0.61 (0.28 to 1.31) |
| <i>diuretics plus ACEIs or ARBs</i>             | 87 (19.3)       | 463 (11.4)           | Reference           | Reference           |
| <i>diuretics plus ACEIs or ARBs plus NSAIDs</i> | 126 (28.0)      | 504 (12.4)           | 1.19 (0.79 to 1.80) | 1.30 (0.81 to 2.09) |

Values are reported as n (%); RR=rate ratio; CI=confidence interval

\*Within 90 days before the index date; current users of other antihypertensive drugs and past users (more than 90 days before the index date) of double and triple therapy combinations are not displayed in the table, but were considered in the regression model

†Adjusted for the covariates listed in Table 1
